# Supplementary material
Source: HighWire-hosted journal article supplement (https://jnm.snmjournals.org/highwire/filestream/95564/field_highwire_adjunct_files/0/229062_Supplemental_Data.pdf)
Supplement: 229062_Supplemental_Data.pdf [file 229062_Supplemental_Data.pdf]

Supplemental Table 1: Patients with definite or unclear metastatic deposits according to NaF PET/CT.

| Patient | Bone metastases according to NaF PET/CT* | PSA value at six weeks and six months after radical prostatectomy | Additional imaging during 24 months of follow up | Clinical follow up and PSA levels after radical prostatectomy – 24 months of follow up               |
|---------|------------------------------------------|-------------------------------------------------------------------|--------------------------------------------------|------------------------------------------------------------------------------------------------------|
| 1       | Bone metastases present                  | <0.1 ng/mL                                                        | ceCT at 24 months without bone metastases        | PSA levels < 0.1 ng/mL at 12 and 24 months after radical prostatectomy. No skeletal related symptoms |
| 2       | Equivocal                                | <0.1 ng/mL                                                        | No additional imaging during follow up           | PSA levels < 0.1 ng/mL at 12 and 24 months after radical prostatectomy. No skeletal related symptoms |
| 3       | Equivocal                                | <0.1 ng/mL                                                        | No additional imaging during follow up           | PSA levels < 0.1 ng/mL at 12 and 24 months after radical prostatectomy. No skeletal related symptoms |
| 4       | Equivocal                                | <0.1 ng/mL                                                        | No additional imaging during follow up           | PSA levels < 0.1 ng/mL at 12 and 24 months after radical prostatectomy. No skeletal related symptoms |
| 5       | Equivocal                                | <0.1 ng/mL                                                        | No additional imaging during follow up           | PSA levels < 0.1 ng/mL at 12 and 24 months after radical prostatectomy. No skeletal related symptoms |
| 6       | Equivocal                                | <0.1 ng/mL                                                        | ceCT at 24 months without bone metastases        | PSA levels < 0.1 ng/mL at 12 and 24 months after radical prostatectomy. No skeletal related symptoms |
| 7       | Equivocal                                | <0.1 ng/mL                                                        | ceCT at 15 months without bone metastases        | PSA levels < 0.1 ng/mL at 12 and 24 months after radical prostatectomy. No skeletal related symptoms |
| 8       | Equivocal                                | <0.1 ng/mL                                                        | No additional imaging during follow up           | PSA levels < 0.1 ng/mL at 12 and 24 months after radical prostatectomy. No skeletal related symptoms |

\* Consensus diagnosis of blinded observers (three point scale).  
ceCT: contrast enhanced CT
